# Supplementary material for: Altered dynamics of ubiquitin hybrid proteins during tumor cell apoptosis
Source: PubMed Central journal article supplement — Cell Death Dis. 2012 Jan 19;3(1):e255–. doi: 10.1038/cddis.2011.142 (PMC3270276; doi:10.1038/cddis.2011.142), 2012-01-19

# Supplementary data

## Supplementary Materials and Methods

### Figure legends

**Supplementary Figure S1.** Induction and Stability of *Uba80* mRNA. **(a)** *Uba80* mRNA induction by various genotoxic drugs. Hep3B cells were incubated under hypoxia, or treated for 48 h with H<sub>2</sub>O<sub>2</sub> (0.5 mM), 5-FU (2 µg/ml), PX (100 nM), TSA (0.5 µM) or etoposide (50 µM) at their IC<sub>50</sub> concentrations. Results shown for Northern blot analysis of *Uba80* and *GAPDH* gene expression are representative of at least three independent experiments. **(b)** Decay of the *RPS27a* transcript in Hep3B cells. Cells were treated with 4HPR alone, actinomycin D (ActD, 5 µg/ml) + 4HPR, or ActD + vehicle. Total RNA was extracted from the three sets and analyzed on Northern blots (left). The autoradiograms were analyzed using the LAS-3000 system and the *RPS27a* transcripts were normalized against the *18S* RNA levels (right).

**Supplementary Figure S2.** Cleavage and Specific Targeting of Ubiquitin and Ribosomal Protein. IF assay of Hep3B **(a)** and A549 cells **(b)** transiently transfected with 2 µg of plasmid encoding the wild-type Uba80 that was end-tagged with both GFP (N-terminal) and RFP (C-terminal), or with a vector control (pGR).

**Supplementary Figure S3.** Cleavage of the Ubiquitin Hybrid Proteins. **(a)** IF analysis in A549 cells transiently transfected with 2 µg of plasmid encoding the wild-type or the deletion mutant Uba52 that was end-tagged with both GFP (N-terminal) and RFP (C-terminal), or

with a vector control (pGR).  $\Delta$ N4 and  $\Delta$ N6 indicate the deletion mutants of Uba52 lacking four and six N-terminal amino acids, respectively (scale bar, 10  $\mu$ m). **(b)** IF analysis in Hep3B cells transiently transfected with 2  $\mu$ g of plasmid encoding the wild-type or mutant GFP-Uba52 or with a vector control (GFP). I77,I78 R indicates a mutant in which I77 and I78 are mutated to R. G76A/I77R indicates that G76 and I77 are mutated to A and R, respectively. G75,76A indicates that G75 and G76 are mutated to A. In I77R, I77 is mutated to R, and in G76A, G76 is mutated to A (scale bar, 10  $\mu$ m). **(c)** Immunoblot analysis with GFP antibodies in Hep3B cells transiently transfected with 2  $\mu$ g of plasmid encoding wild-type, the deletion mutants, and G75,76A mutants that were end-tagged, or with a vector control (pGR). Nuclear and cytoplasmic extracts were obtained by fractionation using NE-PER nuclear and cytoplasmic extraction reagents (Thermo Scientific, Rockford, IL) according to the manufacturer's protocol.

**a**

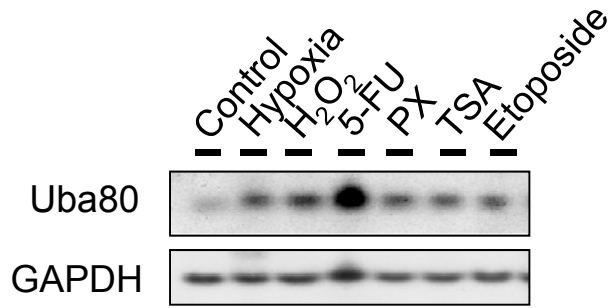

**b**

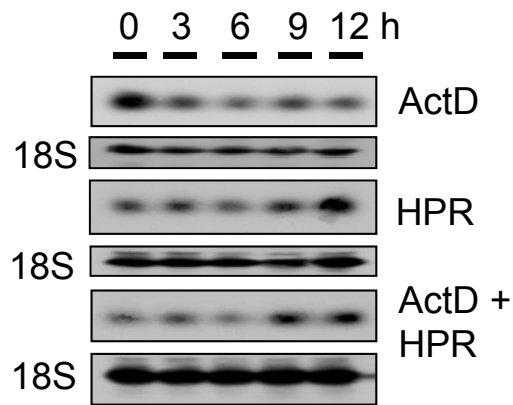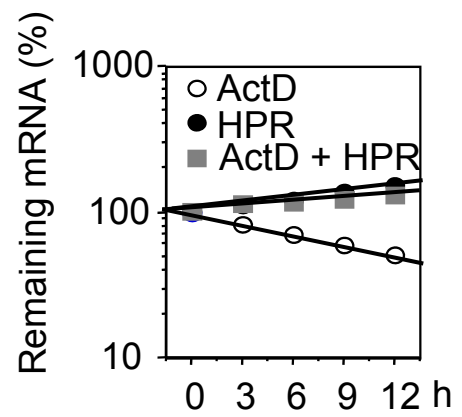

**a**

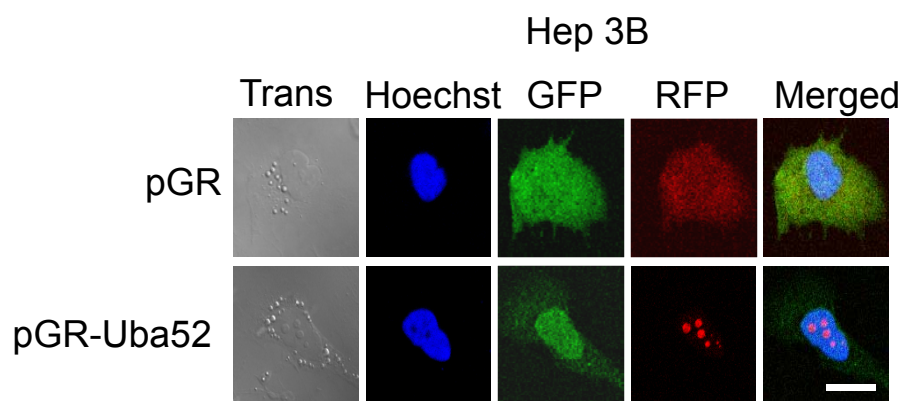

**b**

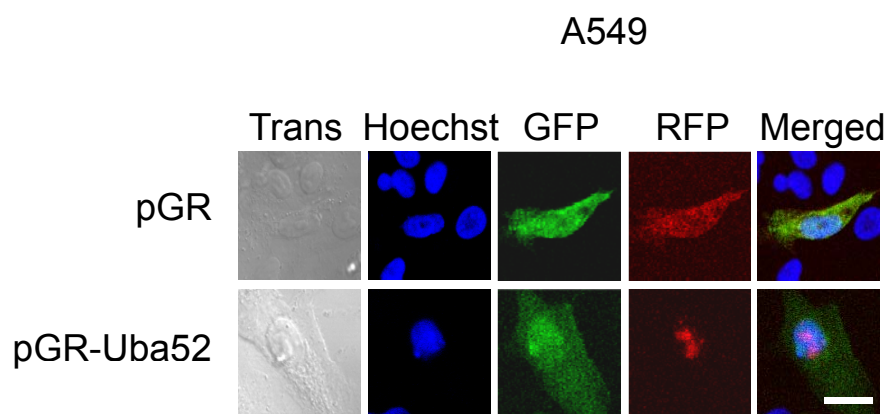

**a**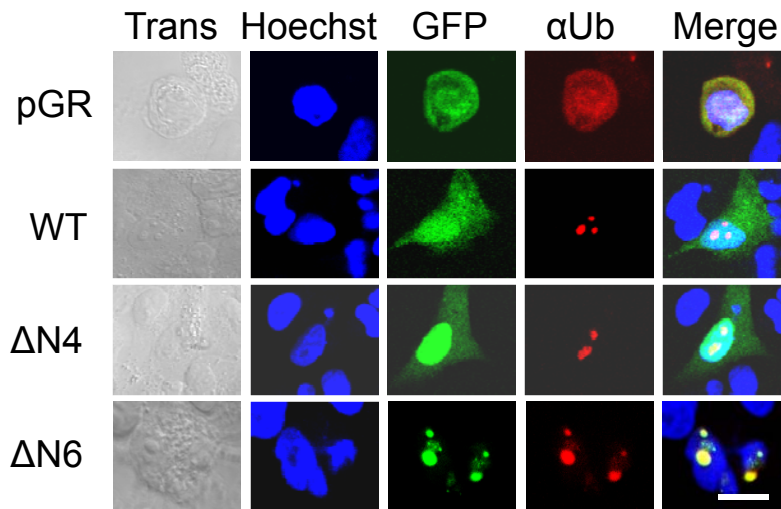**b**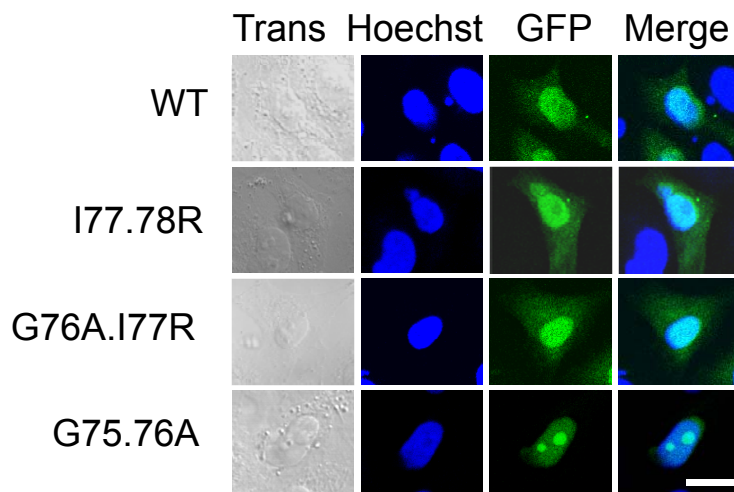**c**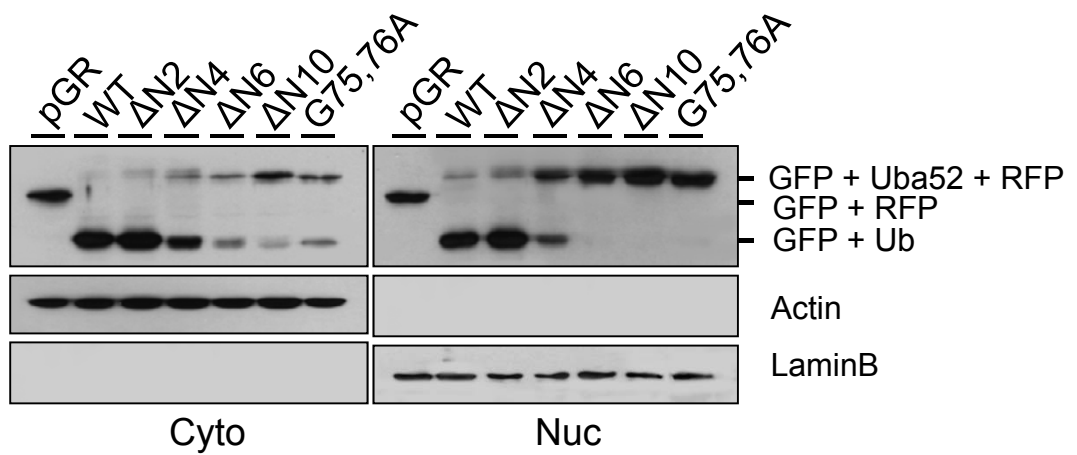

Supplement: cddis2011142x1.pdf [file cddis2011142x1.pdf]
